# Supplementary material
Source: Springer Nature journal article supplement (https://www.springermedizin.de/resource/supplementary/12968_2013_3337_MOESM1_ESM.pdf/9583652)

ED

ES

SA

LA

SA

LA

GRE

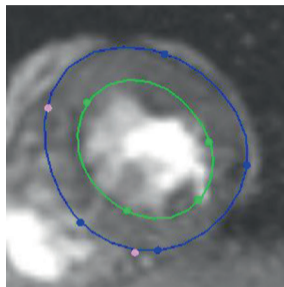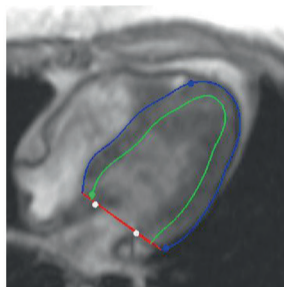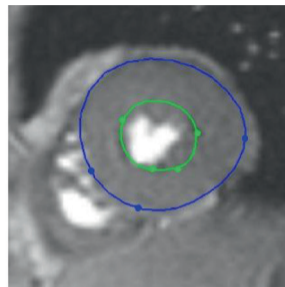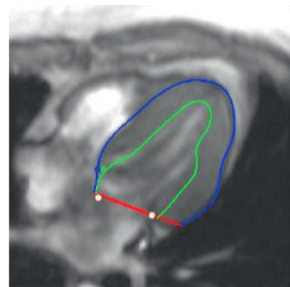

SSFP

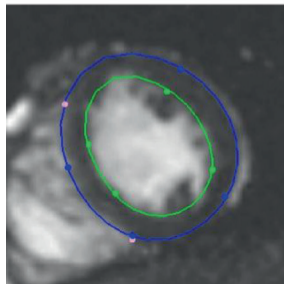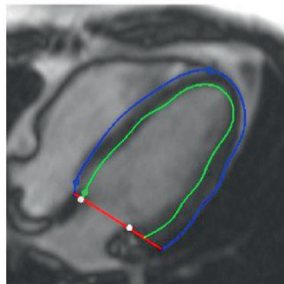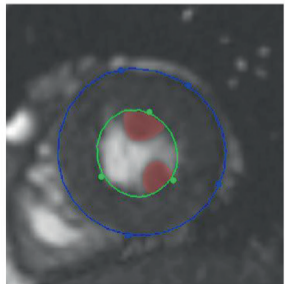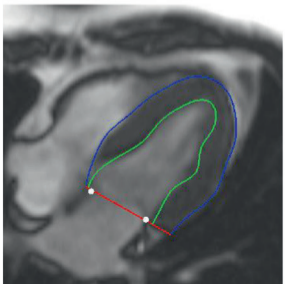

Supplement: MOESM1 [file 9583652]
